# Supplementary material for: L2Δ13, a splicing isoform of lysyl oxidase-like 2, causes adipose tissue loss via the gut microbiota and lipid metabolism
Source: PubMed Central journal article supplement (PMC9436769; doi:10.1016/j.isci.2022.104894), 2022-08-15
Supplement: mmc1.pdf [file mmc1.pdf]

iScience, Volume 25

## **Supplemental information**

**L2 $\Delta$ 13, a splicing isoform of lysyl  
oxidase-like 2, causes adipose tissue loss  
via the gut microbiota and lipid metabolism**

**Yang Chen, Li-Xia He, Jin-Ling Chen, Xin Xu, Juan-Juan Wang, Xiu-Hui Zhan, Ji-Wei Jiao, Geng Dong, En-Min Li, and Li-Yan Xu**

1 **Supplementary Materials**

2 **Supplementary figures**

3 **Figure S1. Expression of LOXL2 $\Delta$ 13 in various mouse tissues. Related to STAR**  
4 **Methods.**

5 **Figure S2. Rarefaction curve analysis of 16S rRNA sequencing. Related to STAR**  
6 **Methods.**

7 **Figure S3. 16S rRNA sequencing for female mice under RD. Related to Figure 1.**

8 **Figure S4. 16S rRNA sequencing for female mice under HFD. Related to Figure**  
9 **3.**

10 **Figure S5. PICRUSt2 analysis of microbiota under HFD. Related to Figure 4.**

11 **Figure S6. Correlation analysis between DEMs and 22 crucial gut microbial**  
12 **species. Related to Figure 5.**

13 **Figure S7. In vitro culture of primary adipose stem cell SVF. Related to STAR**  
14 **Methods.**

15

1 **Supplementary figures**

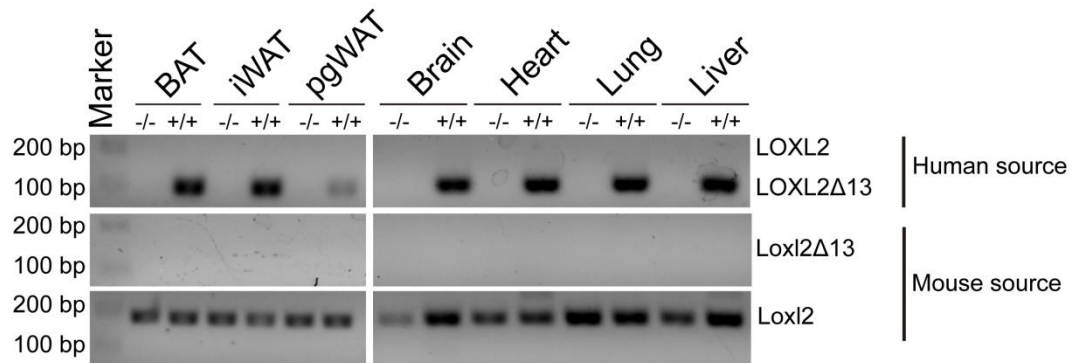

2

3 **Figure S1. Expression of LOXL2Δ13 in various mouse tissues. Related to STAR**

4 **Methods.** RT-PCR was used to detect the expression of LOXL2Δ13 in various mouse tissues,  
5 such as brain, heart, lung, liver, scapular (BAT), inguinal (iWAT) and perigonadal (pgWAT)  
6 adipose tissue samples. -/-: control mice; +/+ : LOXL2Δ13 transgenic mice.

7

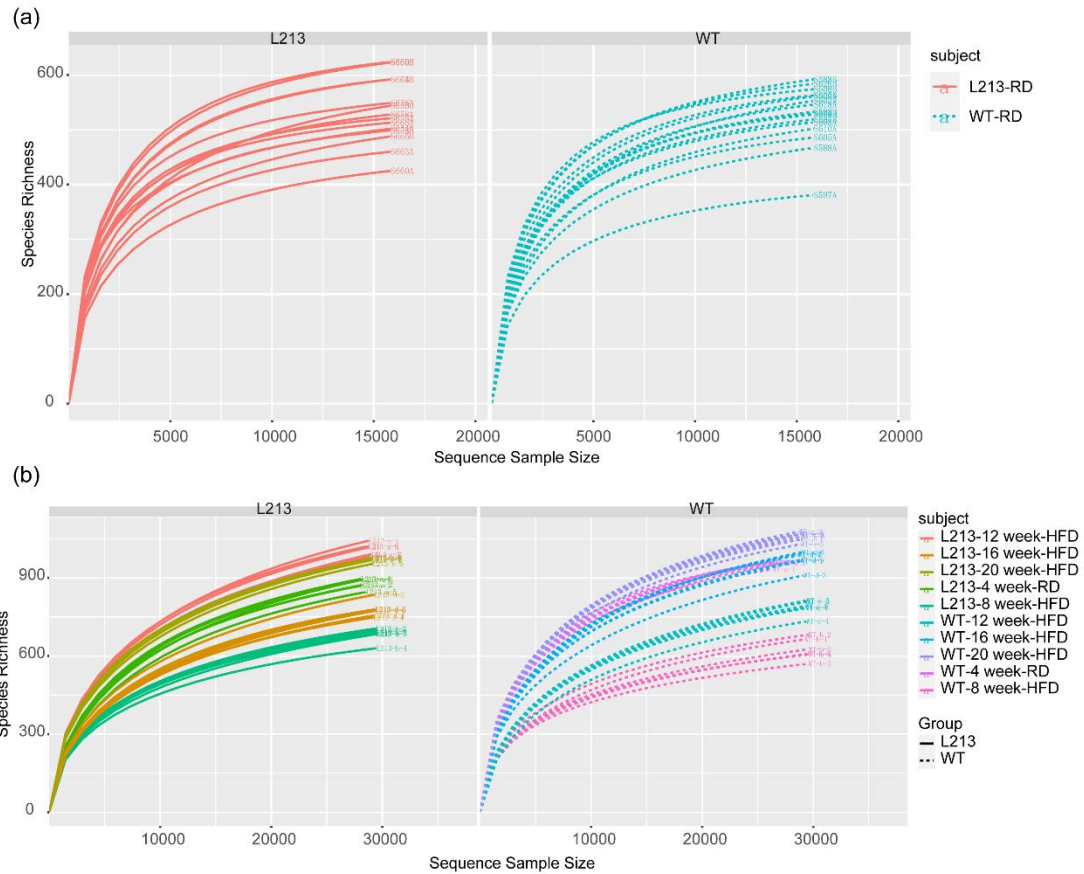

1

2 **Figure S2. Rarefaction curve analysis of 16S rRNA sequencing. Related to STAR**

3 **Methods.** Rarefaction curves were used to evaluate the sequencing depth. The upper

4 part is the 16S rRNA analysis under a regular diet, while the bottom part represents

5 the high-fat diet.

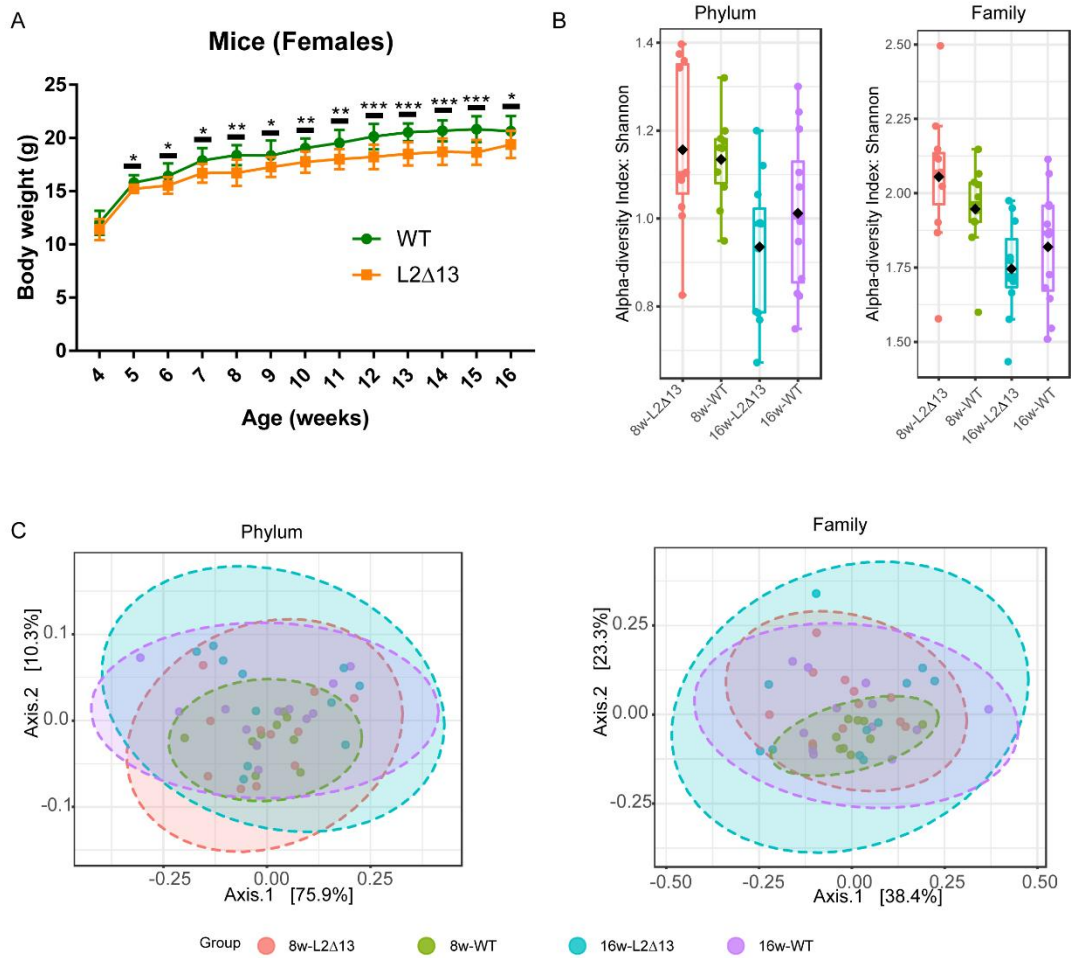

1

2 **Figure S3. 16S rRNA sequencing for female mice under RD. Related to Figure 1.**

3 **A. Body weight of female mice. B. Alpha diversity of the microbiome in female mice.**

4 **C. Beta diversity of the microbiome in female mice.**

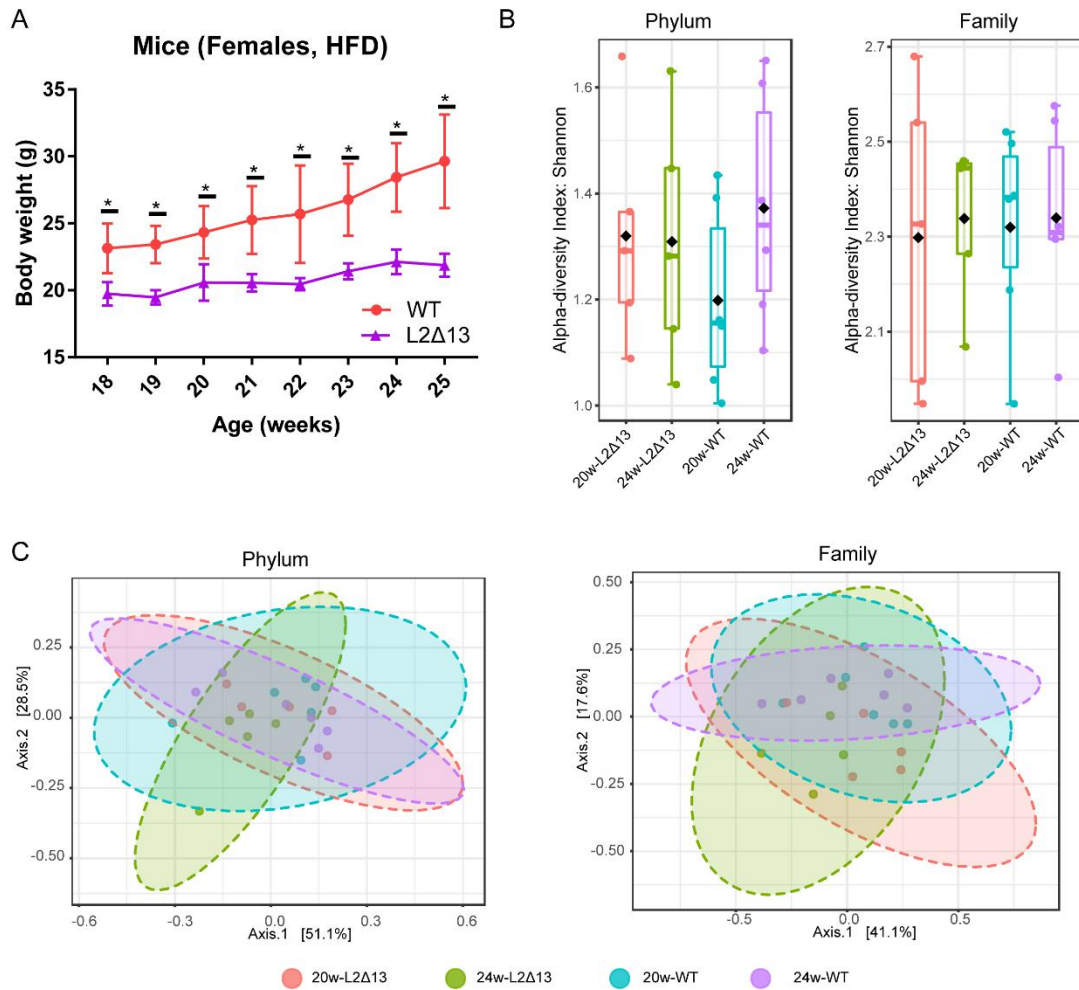

1

2 **Figure S4. 16S rRNA sequencing for female mice under HFD. Related to Figure**  
 3 **3. A.** Body weight of female mice under HFD. **B.** Alpha diversity of the microbiome  
 4 in female mice under HFD. **C.** Beta diversity of the microbiome in female mice under  
 5 HFD.

6

7

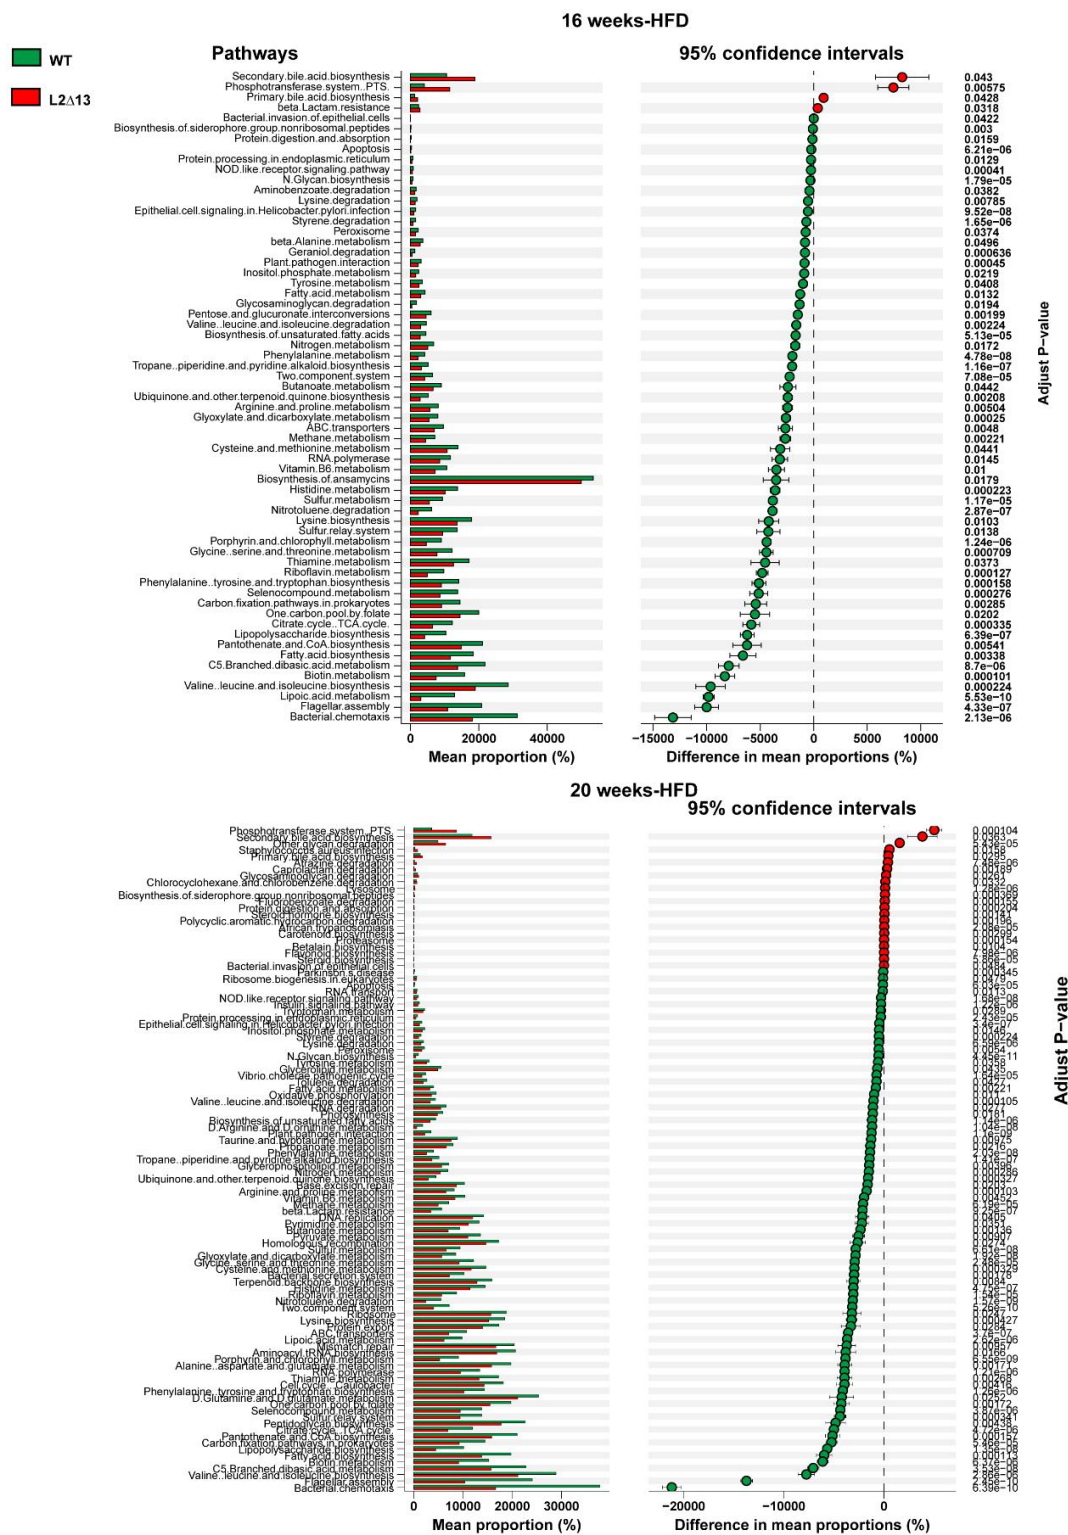

1

2 **Figure S5. PICRUSt2 analysis of the microbiotas under HFD. Related to Figure 4.**

3 The upper part is the PICRUSt2 results at 16 weeks, and the bottom part shows the

4 results at 20 weeks.



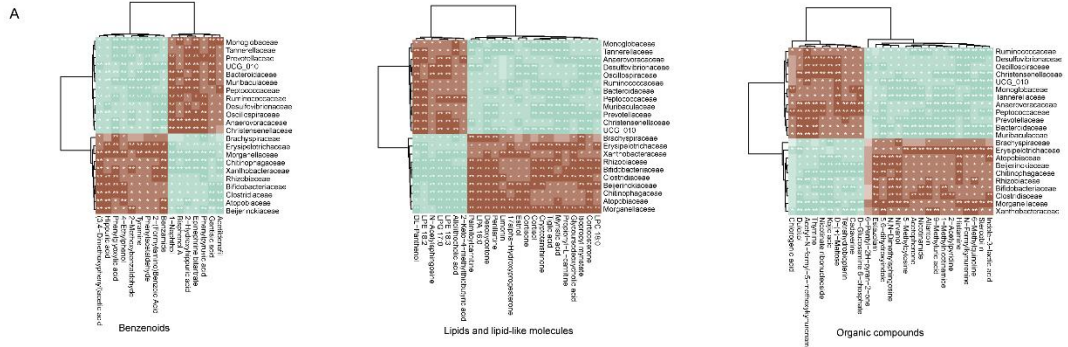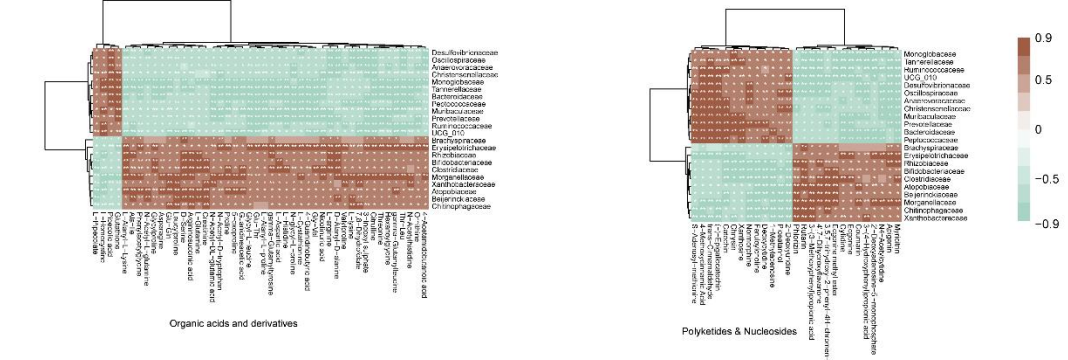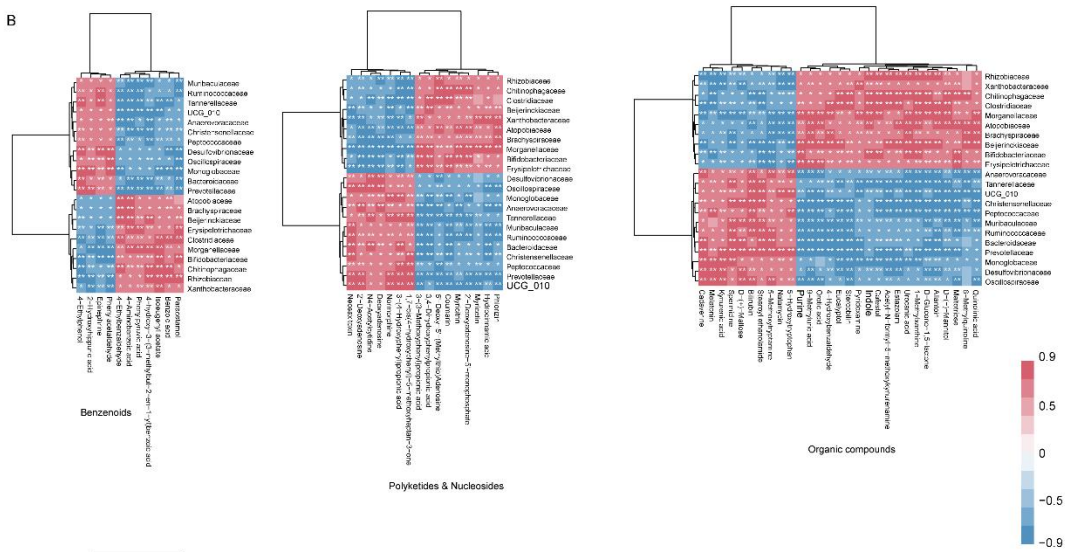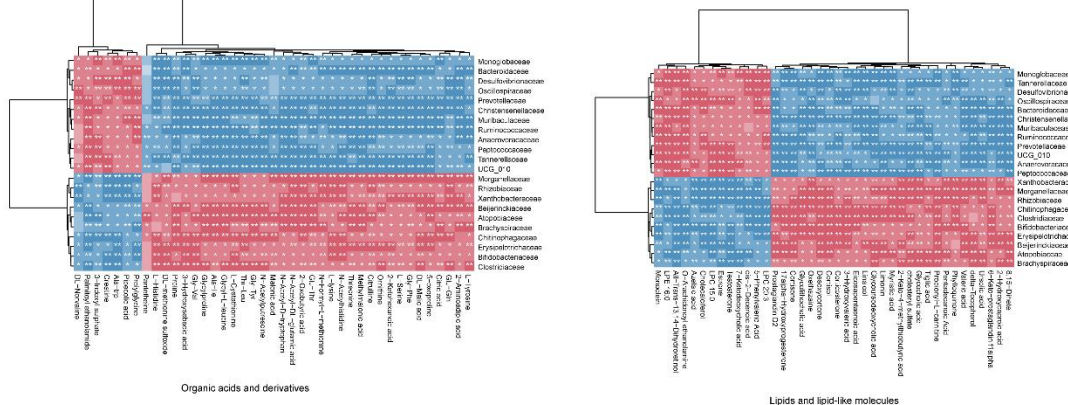



1 **Figure S6. Correlation analysis between DEMs and 22 crucial gut microbial**  
2 **species. Related to Figure 5. (A)** DEMs were divided into five subclasses, and the  
3 heatmap shows the Spearman correlation coefficient and p-value between DEMs and  
4 microbiotas at 16 weeks. **(B)** Spearman correlation analysis between DEMs and 22  
5 crucial gut microbial species at 20 weeks.  
6

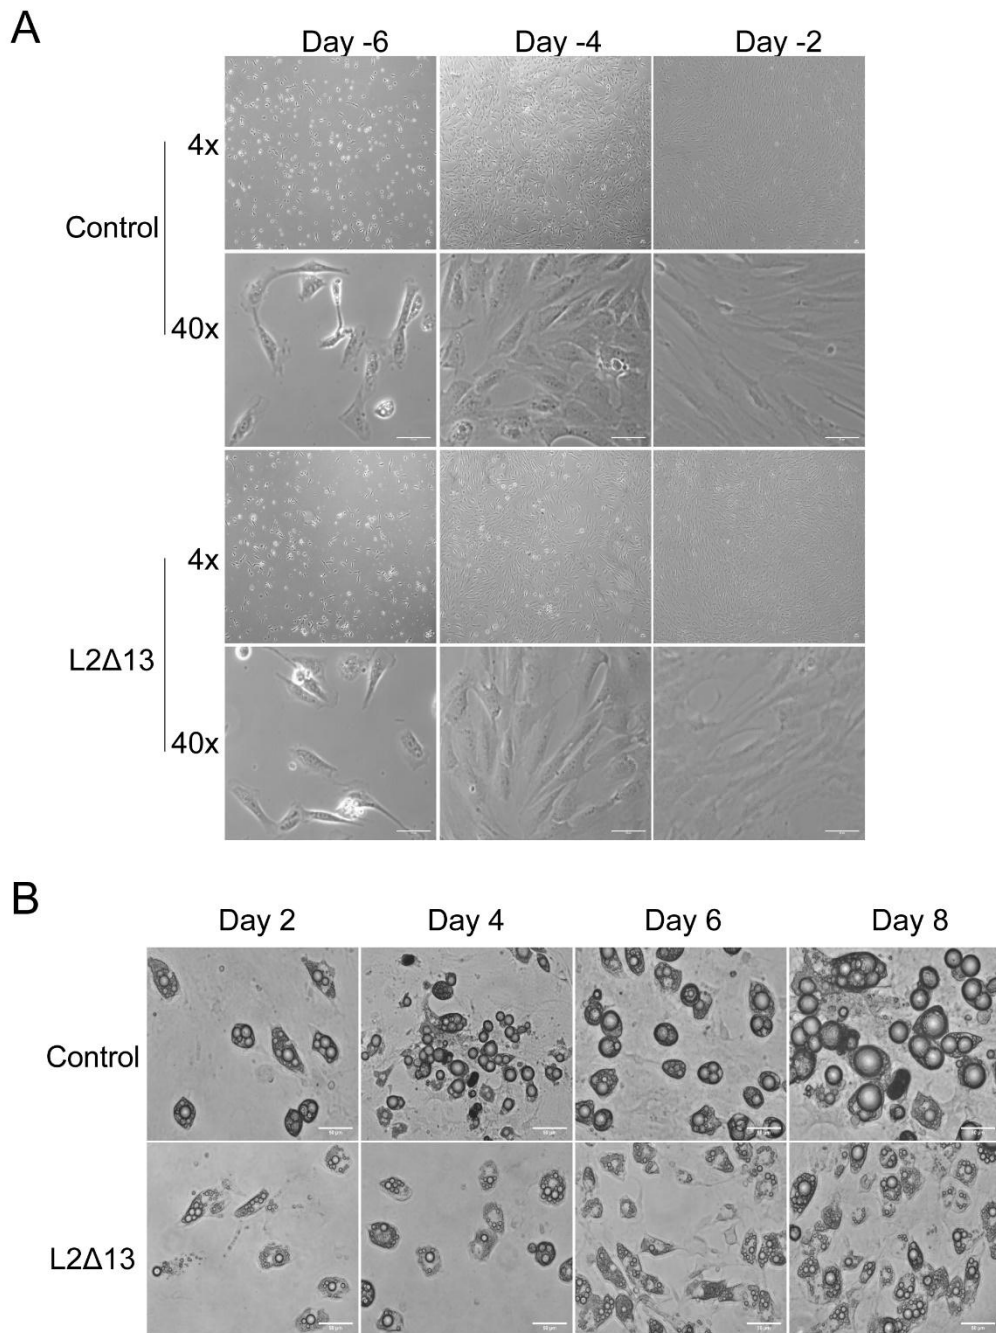

1

2 **Figure S7. In vitro culture of primary adipose stem cell SVF. Related to STAR**

3 **Methods. (A)** After inoculation, cells in the P0 generation of SVFs began to grow

4 adhering to the wall. Continuous observation under the microscope showed that the

5 proliferation and growth of the cells were slow in the first 2 days (Day -6) and began

6 to grow exponentially on the 4th day (Day -4). On the 6th day, the cells reached the

1 contact inhibition state and appeared as fibroblasts (Day -2). **(B)** The cells grew to  
2 more than 90% fusion (Day 0), at which time adipogenic differentiation could be  
3 induced in vitro. After 2 days of adipogenic culture, a few cells became round and  
4 lipid droplets appeared (Day 2). With the increase in time, the lipid droplets also  
5 increased and gathered into larger droplets, and mature adipocytes were formed after  
6 8 days. Scale bars represent 50 $\mu$ m.

7

8

1 **Supplementary tables**

2 **Table S2. Primers for the qRT-PCR assays. Related to Figure 8 and Figure S1.**

3 **Table S4. Enrichment analysis of DEGs between L2Δ13 and WT mice under the**  
4 **high-fat diet. Related to Figure 7.**

5 **Table S5. Enrichment analysis of DEGs between L2Δ13 and WT mice under the**  
6 **regular diet. Related to Figure 8.**

7

**Table S2. The primers for the qRT-PCR assay. Related to Figure 8 and Figure S1.**

| <b>Primer</b>     | <b>Sequence (5'-3')</b>  |
|-------------------|--------------------------|
| Mogat2-F          | TGGGAGCGCAGGTTACAGA      |
| Mogat2-R          | CAGGTGGCATAACAGGACAGA    |
| Scd1-F            | TTCTTGCATACACTCTGGTGC    |
| Scd1-R            | CGGGATTGAATGTTCTTGTCGT   |
| Pck1-F            | AGCATTCAACGCCAGGTTC      |
| Pck1-R            | CGAGTCTGTCAGTTCAATACCAA  |
| Mttp-F            | ATACAAGCTCACGTACTCCACT   |
| Mttp-R            | TCTCTGTTGACCCGCATTTTC    |
| Angptl4-F         | CCCCACGCACCTAGACAATG     |
| Angptl4-R         | GCCTCCATCTGAAGTCATCTCA   |
| Nr1d1-F           | TACATTGGCTCTAGTGGCTCC    |
| Nr1d1-R           | CAGTAGGTGATGGTGGGAAGTA   |
| Mest-F            | CTCCAGAACCGCAGAATCAAC    |
| Mest-R            | AGATACCTCCATTTCGACAGACAG |
| Ttpa-F            | GGGCCATTGGTTGGGAAACA     |
| Ttpa-R            | AGCAGGAAAGCGTCTGTGAG     |
| Oxtr-F            | GATCACGCTCGCCGTCTAC      |
| Oxtr-R            | CCGTCTTGAGTCGCAGATTC     |
| Npr3-F            | GTCTACAGCGACGACAAACTC    |
| Npr3-R            | AGGTCCAAGTCTTTGGTCTCG    |
| Pdk4-F            | GACAGACGCTATCATCTACTT    |
| Pdk4-R            | CTTGGGATACACCAGTCAT      |
| Adipoq-F          | GTTCCCAATGTACCCATTCGC    |
| Adipoq-R          | TGTTGCAGTAGAACTTGCCAG    |
| Plin4-F           | TGTGACCAGCAGTGAAGATG     |
| Plin4-R           | TCCGACAAGGGCCGACT        |
| Pparg-F           | GTTGATTTCTCCAGCATTTTC    |
| Pparg-R           | TTGATCGCACTTTGGTATT      |
| Pgc-1 $\alpha$ -F | ACAGGAACAGCAGCAGAG       |
| Pgc-1 $\alpha$ -R | TAAGGTTTCGCTCAATAGTC     |
| Foxo1-F           | ATGCTCAATCCAGAGGGGAGG    |

|                  |                        |
|------------------|------------------------|
| Foxo1-R          | ACTCGCAGGCCACTTAGAAAA  |
| Apq7-F           | AATATGGTGCGAGAGTTTCTGG |
| Apq7-R           | AACCCAAGTTGACACCGAGAT  |
| C/ebpd-F         | CCTGCCATGTACGACGACGAG  |
| C/ebpd-R         | GCCGCTTTGTGGTTGCTGTTG  |
| $\beta$ -actin-F | GTGACGTTGACATCCGTAAGA  |
| $\beta$ -actin-R | GCCGGACTCATCGTACTCC    |

---

**Primers for the RT-PCR assay to identify the alternative splicing L2 $\Delta$ 13 in mice**

---

|                         |                             |
|-------------------------|-----------------------------|
| LOXL2&L2 $\Delta$ 13-qF | ACTGACGTGCCCCCTGGAGAC       |
| LOXL2&L2 $\Delta$ 13-qR | CCCAAGCTTCCAGAGCCCGCTGAAGTG |
| Loxl2 $\Delta$ 13-qF    | GGGAGACATTCAGAAGAGTT        |
| Loxl2 $\Delta$ 13-qR    | AAGGCTCCACCTGGAACAG         |
| Loxl2-qF                | GAGAACAAGGCATCACCA          |
| Loxl2-qR                | CATCATAGCGGCTCCTG           |

---

1

2



1 **Table S4. The enrichment analysis of DEGs between L2A13 and WT mice under**  
 2 **the high-fat diet. Related to Figure 7.**

| Description  | ID                                              | Enrichment  | LogP         | count |
|--------------|-------------------------------------------------|-------------|--------------|-------|
| HALLMARK     | hallmark myogenesis                             | 21.48485591 | -54.60093701 | 53    |
| HALLMARK     | hallmark hypoxia                                | 8.512867435 | -13.07673682 | 21    |
| HALLMARK     | hallmark tnfa signaling via nfkb                | 6.080619597 | -7.492884664 | 15    |
| HALLMARK     | hallmark epithelial mesenchymal transition      | 4.864495677 | -5.102684911 | 12    |
| HALLMARK     | hallmark glycolysis                             | 3.648371758 | -3.048849647 | 9     |
| HALLMARK     | hallmark kras signaling up                      | 3.648371758 | -3.048849647 | 9     |
| HALLMARK     | hallmark il2 stat5 signaling                    | 3.259293586 | -2.465739178 | 8     |
| HALLMARK     | hallmark apical junction                        | 3.242997118 | -2.452570907 | 8     |
| HALLMARK     | hallmark kras signaling dn                      | 3.242997118 | -2.452570907 | 8     |
| HALLMARK     | hallmark complement                             | 3.242997118 | -2.452570907 | 8     |
| HALLMARK     | hallmark xenobiotic metabolism                  | 3.242997118 | -2.452570907 | 8     |
| HALLMARK     | hallmark fatty acid metabolism                  | 3.591927188 | -2.447822275 | 7     |
| HALLMARK     | hallmark apoptosis                              | 3.524996868 | -2.403037325 | 7     |
| HALLMARK     | hallmark cholesterol homeostasis                | 4.382428538 | -1.875913284 | 4     |
| HALLMARK     | hallmark estrogen response early                | 2.837622478 | -1.907040908 | 7     |
| HALLMARK     | hallmark mtorc1 signaling                       | 2.432247839 | -1.417319171 | 6     |
| HALLMARK     | hallmark uv response up                         | 2.565662277 | -1.331860972 | 5     |
| HALLMARK     | hallmark p53 pathway                            | 2.432247839 | -1.417319171 | 6     |
| KEGG Pathway | Hypertrophic cardiomyopathy                     | 7.61255771  | -7.253208204 | 12    |
| KEGG Pathway | Dilated cardiomyopathy                          | 7.211896778 | -6.987206734 | 12    |
| KEGG Pathway | Oxytocin signaling pathway                      | 5.489825272 | -6.966679336 | 15    |
| KEGG Pathway | Adrenergic signaling in cardiomyocytes          | 4.948162512 | -5.60439587  | 13    |
| KEGG Pathway | Arrhythmogenic right ventricular cardiomyopathy | 6.761153229 | -5.14758308  | 9     |
| KEGG Pathway | Cardiac muscle contraction                      | 5.885998229 | -5.107386356 | 10    |
| KEGG Pathway | p53 signaling pathway                           | 5.55082333  | -3.577532587 | 7     |
| KEGG Pathway | Calcium signaling pathway                       | 3.394789249 | -3.359751863 | 11    |
| KEGG Pathway | HIF-1 signaling pathway                         | 4.114896059 | -3.121666065 | 8     |
| KEGG Pathway | MAPK signaling pathway                          | 2.811455972 | -3.085005962 | 13    |
| KEGG Pathway | Glycolysis / Gluconeogenesis                    | 4.567534626 | -2.694775849 | 6     |
| KEGG Pathway | Biosynthesis of amino acids                     | 4.391860217 | -2.608033952 | 6     |
| KEGG Pathway | Glucagon signaling pathway                      | 3.735133456 | -2.555405189 | 7     |
| KEGG Pathway | Carbon metabolism                               | 3.386943049 | -2.320188107 | 7     |
| KEGG Pathway | Insulin signaling pathway                       | 3.024857368 | -2.282726103 | 8     |
| KEGG Pathway | cGMP-PKG signaling pathway                      | 2.718770611 | -2.01360266  | 8     |
| KEGG Pathway | Tight junction                                  | 2.702683211 | -1.998994421 | 8     |
| KEGG Pathway | Gastric acid secretion                          | 3.806278855 | -1.99243579  | 5     |
| KEGG Pathway | Apoptosis                                       | 2.875246617 | -1.944183877 | 7     |
| KEGG Pathway | Apelin signaling pathway                        | 2.81450197  | -1.896911551 | 7     |
| KEGG Pathway | Cholinergic synapse                             | 3.031549531 | -1.834944668 | 6     |
| KEGG Pathway | Regulation of lipolysis in adipocytes           | 4.152304205 | -1.80529018  | 4     |

|              |                                          |             |              |   |
|--------------|------------------------------------------|-------------|--------------|---|
| KEGG Pathway | Insulin secretion                        | 3.207538361 | -1.696595768 | 5 |
| KEGG Pathway | GnRH signaling pathway                   | 3.102944719 | -1.641152078 | 5 |
| KEGG Pathway | Longevity regulating pathway             | 3.069579722 | -1.623209279 | 5 |
| KEGG Pathway | human papillomavirus infection           | 4.391860217 | -1.514321113 | 3 |
| KEGG Pathway | AMPK signaling pathway                   | 2.556455947 | -1.511879774 | 6 |
| KEGG Pathway | Pentose phosphate pathway                | 4.177623134 | -1.458481324 | 3 |
| KEGG Pathway | Fructose and mannose metabolism          | 4.177623134 | -1.458481324 | 3 |
| KEGG Pathway | human immunodeficiency virus 1 infection | 4.177623134 | -1.458481324 | 3 |
| KEGG Pathway | NF-kappa B signaling pathway             | 2.771562273 | -1.457158253 | 5 |
| KEGG Pathway | Proteoglycans in cancer                  | 2.114599364 | -1.431628761 | 8 |
| KEGG Pathway | Mineral absorption                       | 3.644309542 | -1.309247644 | 3 |
| KEGG Pathway | Salivary secretion                       | 2.8908447   | -1.301222342 | 4 |

1

2

1 **Table S5. The enrichment analysis of DEGs between L2A13 and WT mice under**  
2 **the regular diet. Related to Figure 8.**

| Category     | Description                                | Enrichment  | LogP         | Count |
|--------------|--------------------------------------------|-------------|--------------|-------|
| Hallmark     | HALLMARK INTERFERON GAMMA RESPONSE         | 4.93919551  | -32.3623578  | 75    |
| Hallmark     | HALLMARK ALLOGRAFT REJECTION               | 4.80748363  | -30.62248392 | 73    |
| Hallmark     | HALLMARK IL2 STAT5 SIGNALING               | 3.97121247  | -20.38286784 | 60    |
| Hallmark     | HALLMARK ADIPOGENESIS                      | 3.819644528 | -18.81841703 | 58    |
| Hallmark     | HALLMARK INTERFERON ALPHA RESPONSE         | 5.024061412 | -16.59416339 | 37    |
| Hallmark     | HALLMARK EPITHELIAL MESENCHYMAL TRANSITION | 3.490364827 | -15.39977016 | 53    |
| Hallmark     | HALLMARK MYOGENESIS                        | 3.424508887 | -14.74903235 | 52    |
| Hallmark     | HALLMARK INFLAMMATORY RESPONSE             | 3.292797007 | -13.48152311 | 50    |
| Hallmark     | HALLMARK TNFA SIGNALING VIA NFKB           | 3.095229186 | -11.6672277  | 47    |
| Hallmark     | HALLMARK APICAL JUNCTION                   | 3.029373246 | -11.08624397 | 46    |
| Hallmark     | HALLMARK KRAS SIGNALING UP                 | 3.029373246 | -11.08624397 | 46    |
| Hallmark     | HALLMARK IL6 JAK STAT3 SIGNALING           | 3.784824145 | -8.424015242 | 25    |
| Hallmark     | HALLMARK FATTY ACID METABOLISM             | 2.834306284 | -7.604939401 | 34    |
| Hallmark     | HALLMARK ESTROGEN RESPONSE LATE            | 2.568381665 | -7.369752571 | 39    |
| Hallmark     | HALLMARK ESTROGEN RESPONSE EARLY           | 2.502525725 | -6.891206902 | 38    |
| Hallmark     | HALLMARK APOPTOSIS                         | 2.617875881 | -6.365660197 | 32    |
| Hallmark     | HALLMARK G2M CHECKPOINT                    | 2.370813845 | -5.975586868 | 36    |
| Hallmark     | HALLMARK E2F TARGETS                       | 2.370813845 | -5.975586868 | 36    |
| Hallmark     | HALLMARK COMPLEMENT                        | 2.304957905 | -5.539004196 | 35    |
| Hallmark     | HALLMARK XENOBIOTIC METABOLISM             | 2.304957905 | -5.539004196 | 35    |
| Hallmark     | HALLMARK KRAS SIGNALING DN                 | 2.239101964 | -5.116918936 | 34    |
| Hallmark     | HALLMARK TGF BETA SIGNALING                | 3.658663341 | -5.111827107 | 15    |
| Hallmark     | HALLMARK UV RESPONSE DN                    | 2.469597755 | -4.98321479  | 27    |
| Hallmark     | HALLMARK MITOTIC SPINDLE                   | 2.117979984 | -4.360772374 | 32    |
| Hallmark     | HALLMARK HYPOXIA                           | 2.107390084 | -4.317345454 | 32    |
| Hallmark     | HALLMARK P53 PATHWAY                       | 2.041534144 | -3.94043814  | 31    |
| Hallmark     | HALLMARK APICAL SURFACE                    | 3.292797007 | -3.460901635 | 11    |
| Hallmark     | HALLMARK UV RESPONSE UP                    | 2.084048738 | -3.436797578 | 25    |
| Hallmark     | HALLMARK WNT BETA CATENIN SIGNALING        | 2.822397434 | -2.431099032 | 9     |
| Hallmark     | HALLMARK COAGULATION                       | 1.90886783  | -2.410553361 | 20    |
| Hallmark     | HALLMARK HEDGEHOG SIGNALING                | 2.926930672 | -2.316574277 | 8     |
| Hallmark     | HALLMARK MTORC1 SIGNALING                  | 1.712254443 | -2.297291006 | 26    |
| Hallmark     | HALLMARK HEME METABOLISM                   | 1.712254443 | -2.297291006 | 26    |
| Hallmark     | HALLMARK NOTCH SIGNALING                   | 2.881197381 | -2.047101324 | 7     |
| Hallmark     | HALLMARK CHOLESTEROL HOMEOSTASIS           | 2.135868329 | -2.021037727 | 12    |
| Hallmark     | HALLMARK PEROXISOME                        | 1.899690581 | -1.924620693 | 15    |
| Hallmark     | HALLMARK ANGIOGENESIS                      | 2.561064338 | -1.767473404 | 7     |
| KEGG Pathway | Cytokine-cytokine receptor interaction     | 3.268405918 | -17.64444471 | 67    |
| KEGG Pathway | Rap1 signaling pathway                     | 3.324156978 | -14.43233417 | 53    |

|              |                                                        |             |              |    |
|--------------|--------------------------------------------------------|-------------|--------------|----|
| KEGG Pathway | Primary immunodeficiency                               | 7.47553915  | -13.95921619 | 21 |
| KEGG Pathway | Chemokine signaling pathway                            | 3.473719919 | -13.92766424 | 48 |
| KEGG Pathway | Rap1 signaling pathway                                 | 3.119491901 | -13.44756609 | 54 |
| KEGG Pathway | T cell receptor signaling pathway                      | 4.219895193 | -12.35779793 | 33 |
| KEGG Pathway | NF-kappa B signaling pathway                           | 4.159322535 | -11.11795244 | 30 |
| KEGG Pathway | Pathways in cancer                                     | 2.367479367 | -11.07505611 | 71 |
| KEGG Pathway | PI3K-Akt signaling pathway                             | 2.391610457 | -10.98979199 | 69 |
| KEGG Pathway | B cell receptor signaling pathway                      | 4.637742263 | -10.54291963 | 25 |
| KEGG Pathway | Arrhythmogenic right ventricular cardiomyopathy (ARVC) | 4.573329176 | -10.39008588 | 25 |
| KEGG Pathway | NF-kappa B signaling pathway                           | 3.815951671 | -10.37927308 | 31 |
| KEGG Pathway | Leukocyte transendothelial migration                   | 3.697175586 | -10.2922253  | 32 |
| KEGG Pathway | Hematopoietic cell lineage                             | 3.937777864 | -10.12042993 | 29 |
| KEGG Pathway | Valine, leucine and isoleucine degradation             | 5.487995011 | -10.1072038  | 20 |
| KEGG Pathway | Cell adhesion molecules (CAMs)                         | 3.292797007 | -9.908637847 | 36 |
| KEGG Pathway | PI3K-Akt signaling pathway                             | 2.349246987 | -9.47384343  | 61 |
| KEGG Pathway | Focal adhesion                                         | 2.779848729 | -8.95526586  | 42 |
| KEGG Pathway | Regulation of actin cytoskeleton                       | 2.671514552 | -8.592246633 | 43 |
| KEGG Pathway | ECM-receptor interaction                               | 3.854981861 | -8.289724408 | 24 |
| KEGG Pathway | Adherens junction                                      | 4.024529675 | -8.037799752 | 22 |
| KEGG Pathway | Axon guidance                                          | 2.784765468 | -7.995705928 | 37 |
| KEGG Pathway | Th17 cell differentiation                              | 3.292797007 | -7.863537677 | 28 |
| KEGG Pathway | Tight junction                                         | 2.789192758 | -7.817739319 | 36 |
| KEGG Pathway | Th17 cell differentiation                              | 3.32357081  | -7.699945117 | 27 |
| KEGG Pathway | Regulation of lipolysis in adipocytes                  | 4.314699526 | -7.581326307 | 19 |
| KEGG Pathway | Fc gamma R-mediated phagocytosis                       | 3.473719919 | -7.316980505 | 24 |
| KEGG Pathway | Ras signaling pathway                                  | 2.33928436  | -7.260296386 | 46 |
| KEGG Pathway | Oxytocin signaling pathway                             | 2.77288169  | -6.964690408 | 32 |
| KEGG Pathway | Oxytocin signaling pathway                             | 2.699684502 | -6.870449207 | 33 |
| KEGG Pathway | Dilated cardiomyopathy                                 | 3.365970273 | -6.767971349 | 23 |
| KEGG Pathway | Small cell lung cancer                                 | 3.449596864 | -6.705102181 | 22 |
| KEGG Pathway | Th1 and Th2 cell differentiation                       | 3.225597068 | -6.656794929 | 24 |
| KEGG Pathway | Measles                                                | 2.850480991 | -6.644377674 | 29 |
| KEGG Pathway | Th1 and Th2 cell differentiation                       | 3.292797007 | -6.580833779 | 23 |
| KEGG Pathway | Calcium signaling pathway                              | 2.532920774 | -6.533307088 | 35 |
| KEGG Pathway | Osteoclast differentiation                             | 2.836871267 | -6.393664196 | 28 |
| KEGG Pathway | Measles                                                | 2.584220436 | -6.060661646 | 31 |
| KEGG Pathway | beta-Alanine metabolism                                | 5.098524397 | -5.892219947 | 12 |
| KEGG Pathway | Osteoclast differentiation                             | 2.672414962 | -5.840973948 | 28 |
| KEGG Pathway | NOD-like receptor signaling pathway                    | 2.479282452 | -5.820277265 | 32 |
| KEGG Pathway | Epstein-Barr virus infection                           | 2.070387415 | -5.804156899 | 47 |
| KEGG Pathway | Jak-STAT signaling pathway                             | 2.532920774 | -5.697951953 | 30 |
| KEGG Pathway | Gastric acid secretion                                 | 3.336700967 | -5.642948446 | 19 |
| KEGG Pathway | cAMP signaling pathway                                 | 2.328240308 | -5.641620867 | 35 |
| KEGG Pathway | Gastric acid secretion                                 | 3.292797007 | -5.549865141 | 19 |

|              |                                           |             |              |    |
|--------------|-------------------------------------------|-------------|--------------|----|
| KEGG Pathway | MAPK signaling pathway                    | 2.117720428 | -5.397942302 | 41 |
| KEGG Pathway | HTLV-I infection                          | 2.109448082 | -5.35470175  | 41 |
| KEGG Pathway | Platelet activation                       | 2.634237605 | -5.350811772 | 26 |
| KEGG Pathway | Tryptophan metabolism                     | 4.280636109 | -5.337272159 | 13 |
| KEGG Pathway | Cholinergic synapse                       | 2.748769675 | -5.323212344 | 24 |
| KEGG Pathway | PPAR signaling pathway                    | 3.292797007 | -5.291141548 | 18 |
| KEGG Pathway | Viral myocarditis                         | 3.5718476   | -5.263034423 | 16 |
| KEGG Pathway | Tyrosine metabolism                       | 4.515835895 | -5.244734182 | 12 |
| KEGG Pathway | aldosterone synthesis and secretion       | 2.840844476 | -5.176498072 | 22 |
| KEGG Pathway | Natural killer cell mediated cytotoxicity | 2.574818712 | -5.16156185  | 26 |
| KEGG Pathway | Hippo signaling pathway                   | 2.34659097  | -5.145704165 | 31 |
| KEGG Pathway | Salivary secretion                        | 2.926930672 | -4.968181113 | 20 |
| KEGG Pathway | Hypertrophic cardiomyopathy (HCM)         | 3.015091235 | -4.947604251 | 19 |
| KEGG Pathway | Adipocytokine signaling pathway           | 3.245075311 | -4.940705304 | 17 |
| KEGG Pathway | Apoptosis                                 | 2.481528179 | -4.861602632 | 26 |
| KEGG Pathway | Phenylalanine metabolism                  | 6.19820613  | -4.847598402 | 8  |
| KEGG Pathway | cGMP-PKG signaling pathway                | 2.343340201 | -4.844787246 | 29 |
| KEGG Pathway | Insulin secretion                         | 2.863301745 | -4.817646419 | 20 |
| KEGG Pathway | TNF signaling pathway                     | 2.683019783 | -4.758767971 | 22 |
| KEGG Pathway | cAMP signaling pathway                    | 2.098065349 | -4.731514994 | 36 |
| KEGG Pathway | drug metabolism                           | 2.589207903 | -4.681961488 | 23 |
| KEGG Pathway | Salivary secretion                        | 2.802380431 | -4.672259702 | 20 |
| KEGG Pathway | Fluid shear stress and atherosclerosis    | 2.411625977 | -4.634653978 | 26 |
| KEGG Pathway | Amoebiasis                                | 2.743997505 | -4.531774464 | 20 |
| KEGG Pathway | Aldosterone synthesis and secretion       | 2.891236396 | -4.458237014 | 18 |
| KEGG Pathway | Glutathione metabolism                    | 3.414752451 | -4.440518948 | 14 |
